# Supplementary material
Source: publisher site journal article supplement (https://www.spandidos-publications.com/6446/downloadSupplementary)

Figure S1. Scatter plot for serum OPG and sRANKL concentrations reveals no correlation between the two variables. OPG, osteoprotegerin. sRANKL, soluble receptor activator of nuclear factor- $\kappa$ B ligand.

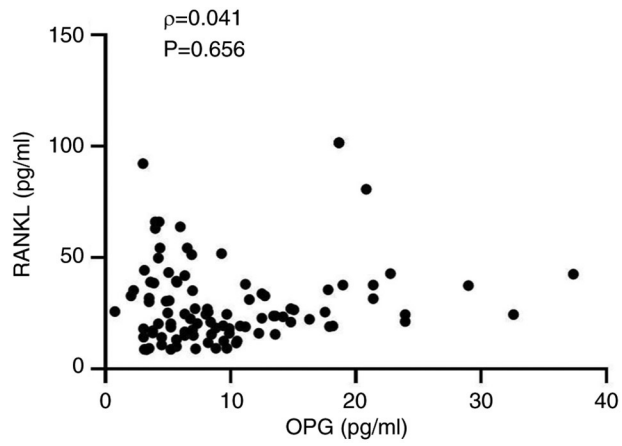

Figure S2. Scatter plots depicting the correlation between serum OPG concentration and factors associated with coronary artery disease. OPG correlation with (A) age, (B) FPG, (C) LDL-C, (D) BMI, (E) alkaline phosphatase, (F) total calcium and (G) inorganic phosphorus. OPG, osteoprotegerin; FPG fasting plasma glucose; LDL-C low-density lipoprotein-cholesterol; BMI, body mass index.

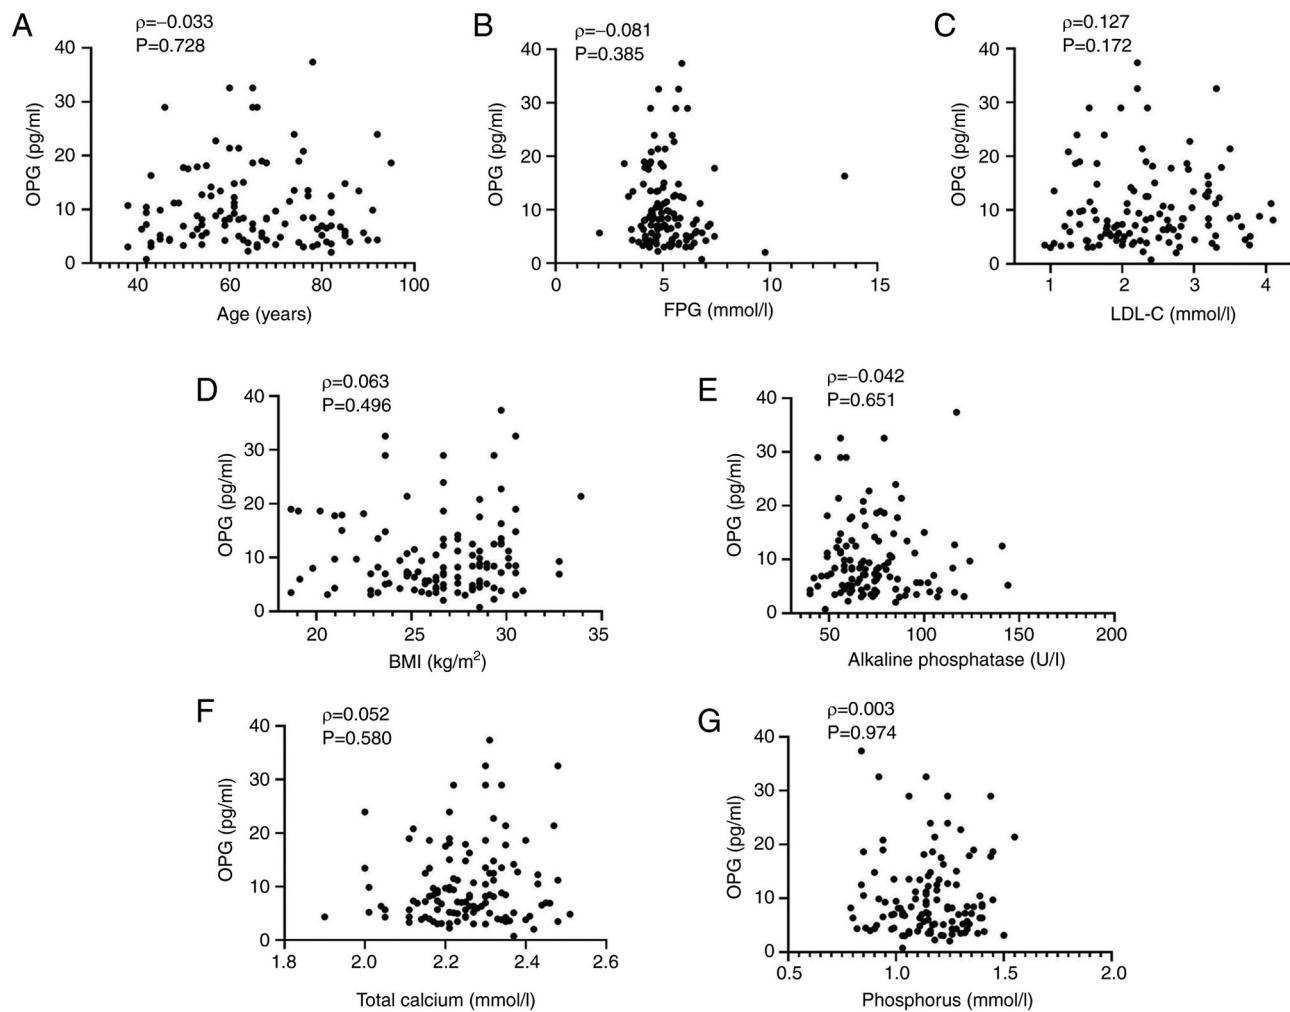

Figure S3 Scatter plots depicting the correlation between sRANKL concentration and factors associated with coronary artery disease. sRANKL correlation with (A) age, (B) FPG, (C) LDL-C, (D) BMI, (E) alkaline phosphatase, (F) total calcium and (G) inorganic phosphorus. sRANKL, soluble receptor activator of nuclear factor- $\kappa$ B ligand; FPG fasting blood glucose; LDL-C low-density lipoprotein-cholesterol; BMI, body mass index.

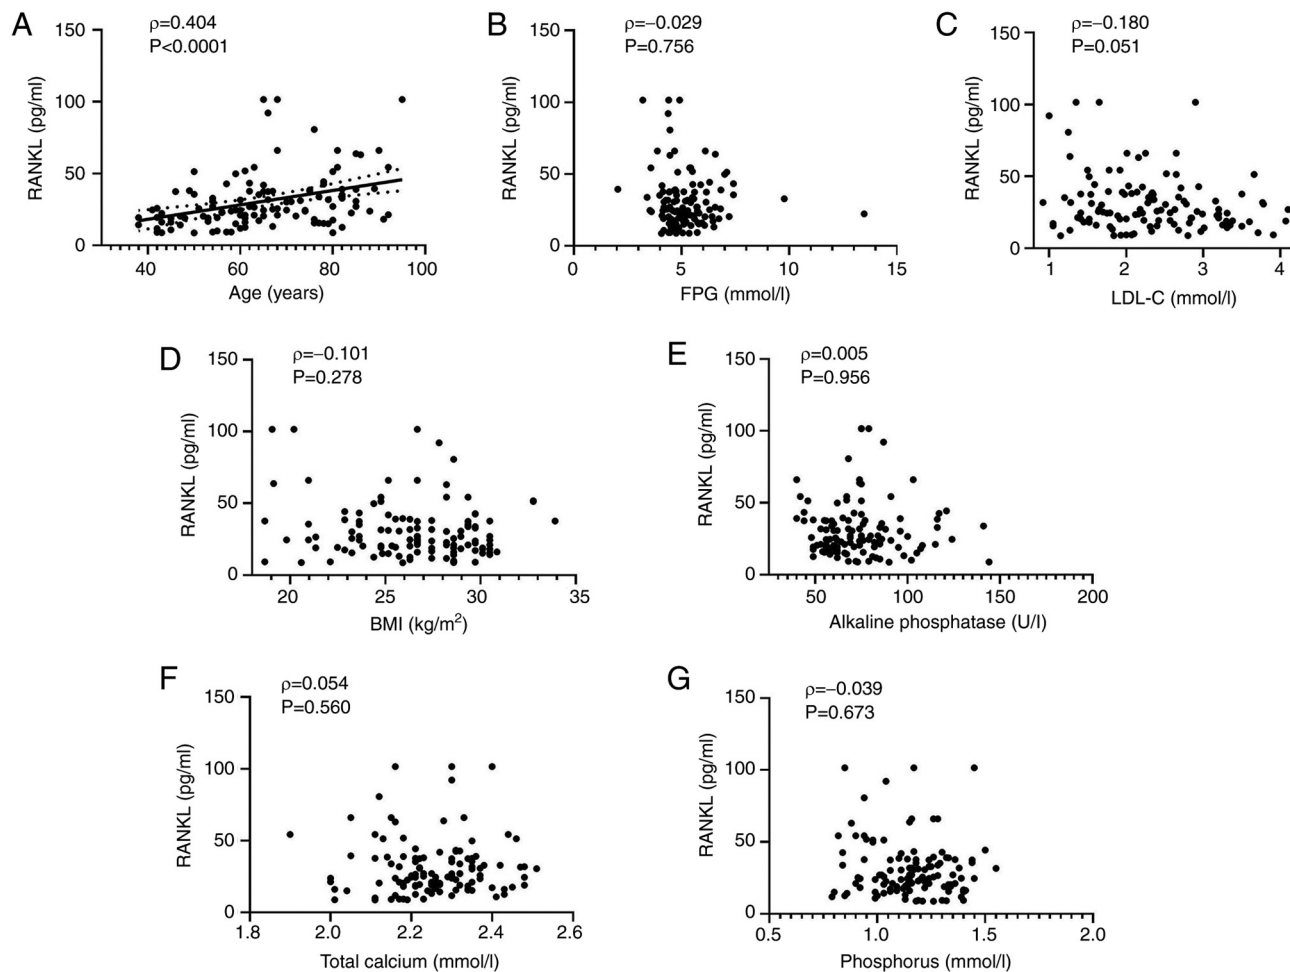

Supplement: Supplementary file 1 [file downloadSupplementary]
